# Supplementary material for: Comprehensive Identification and Analyses of the GRF Gene Family in the Whole-Genome of Four Juglandaceae Species
Source: MDPI journal article supplement (doi:10.3390/ijms232012663), 2022-10-21
Supplement: s1 [file s1]

| Species                     | Duplications | cD_Nodes | Losses |
|-----------------------------|--------------|----------|--------|
| Magnoliopsida               | 10           | 0        | 0      |
| <i>Arabidopsis thaliana</i> | 6            | 0        | 4      |
| Juglandaceae                | 11           | 0        | 2      |
| <i>Carya illinoensis</i>    | 0            | 0        | 5      |
| Juglans                     | 4            | 11       | 5      |
| <i>Juglans regia</i>        | 0            | 0        | 2      |
| <i>Juglans sigillata</i>    | 1            | 0        | 1      |
| <i>Juglans mandshurica</i>  | 3            | 0        | 5      |

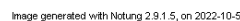

Figure S3 Duplication, loss of the GRF gene family in four Juglandaceae species
