# Supplementary figures and images for: Comprehensive Identification and Analyses of the GRF Gene Family in the Whole-Genome of Four Juglandaceae Species
Source: MDPI journal article supplement (doi:10.3390/ijms232012663), 2022-10-21

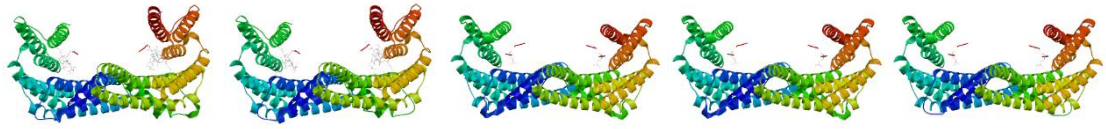

JrGRF9

JrGRF5

JrGRF8

JrGRF2

JrGRF13

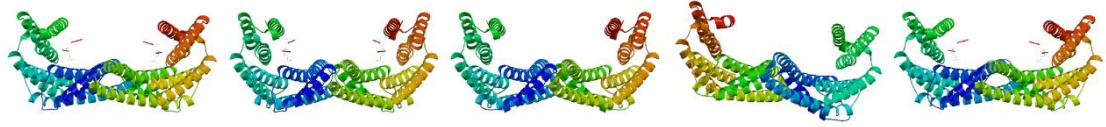

JrGRF4

JrGRF12

JrGRF6

JrGRF11

JrGRF15

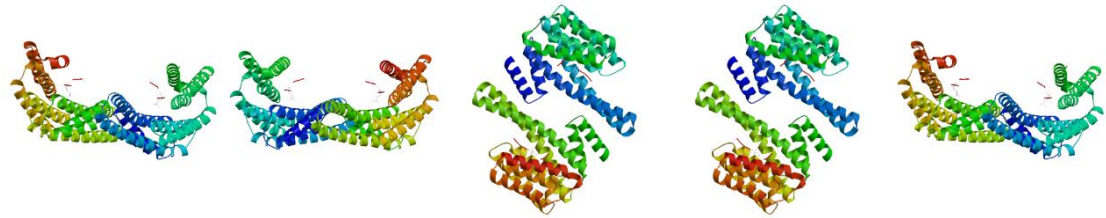

JrGRF1

JrGRF14

JrGRF3

JrGRF7

JrGRF10

Supplement: s1 [file s1]

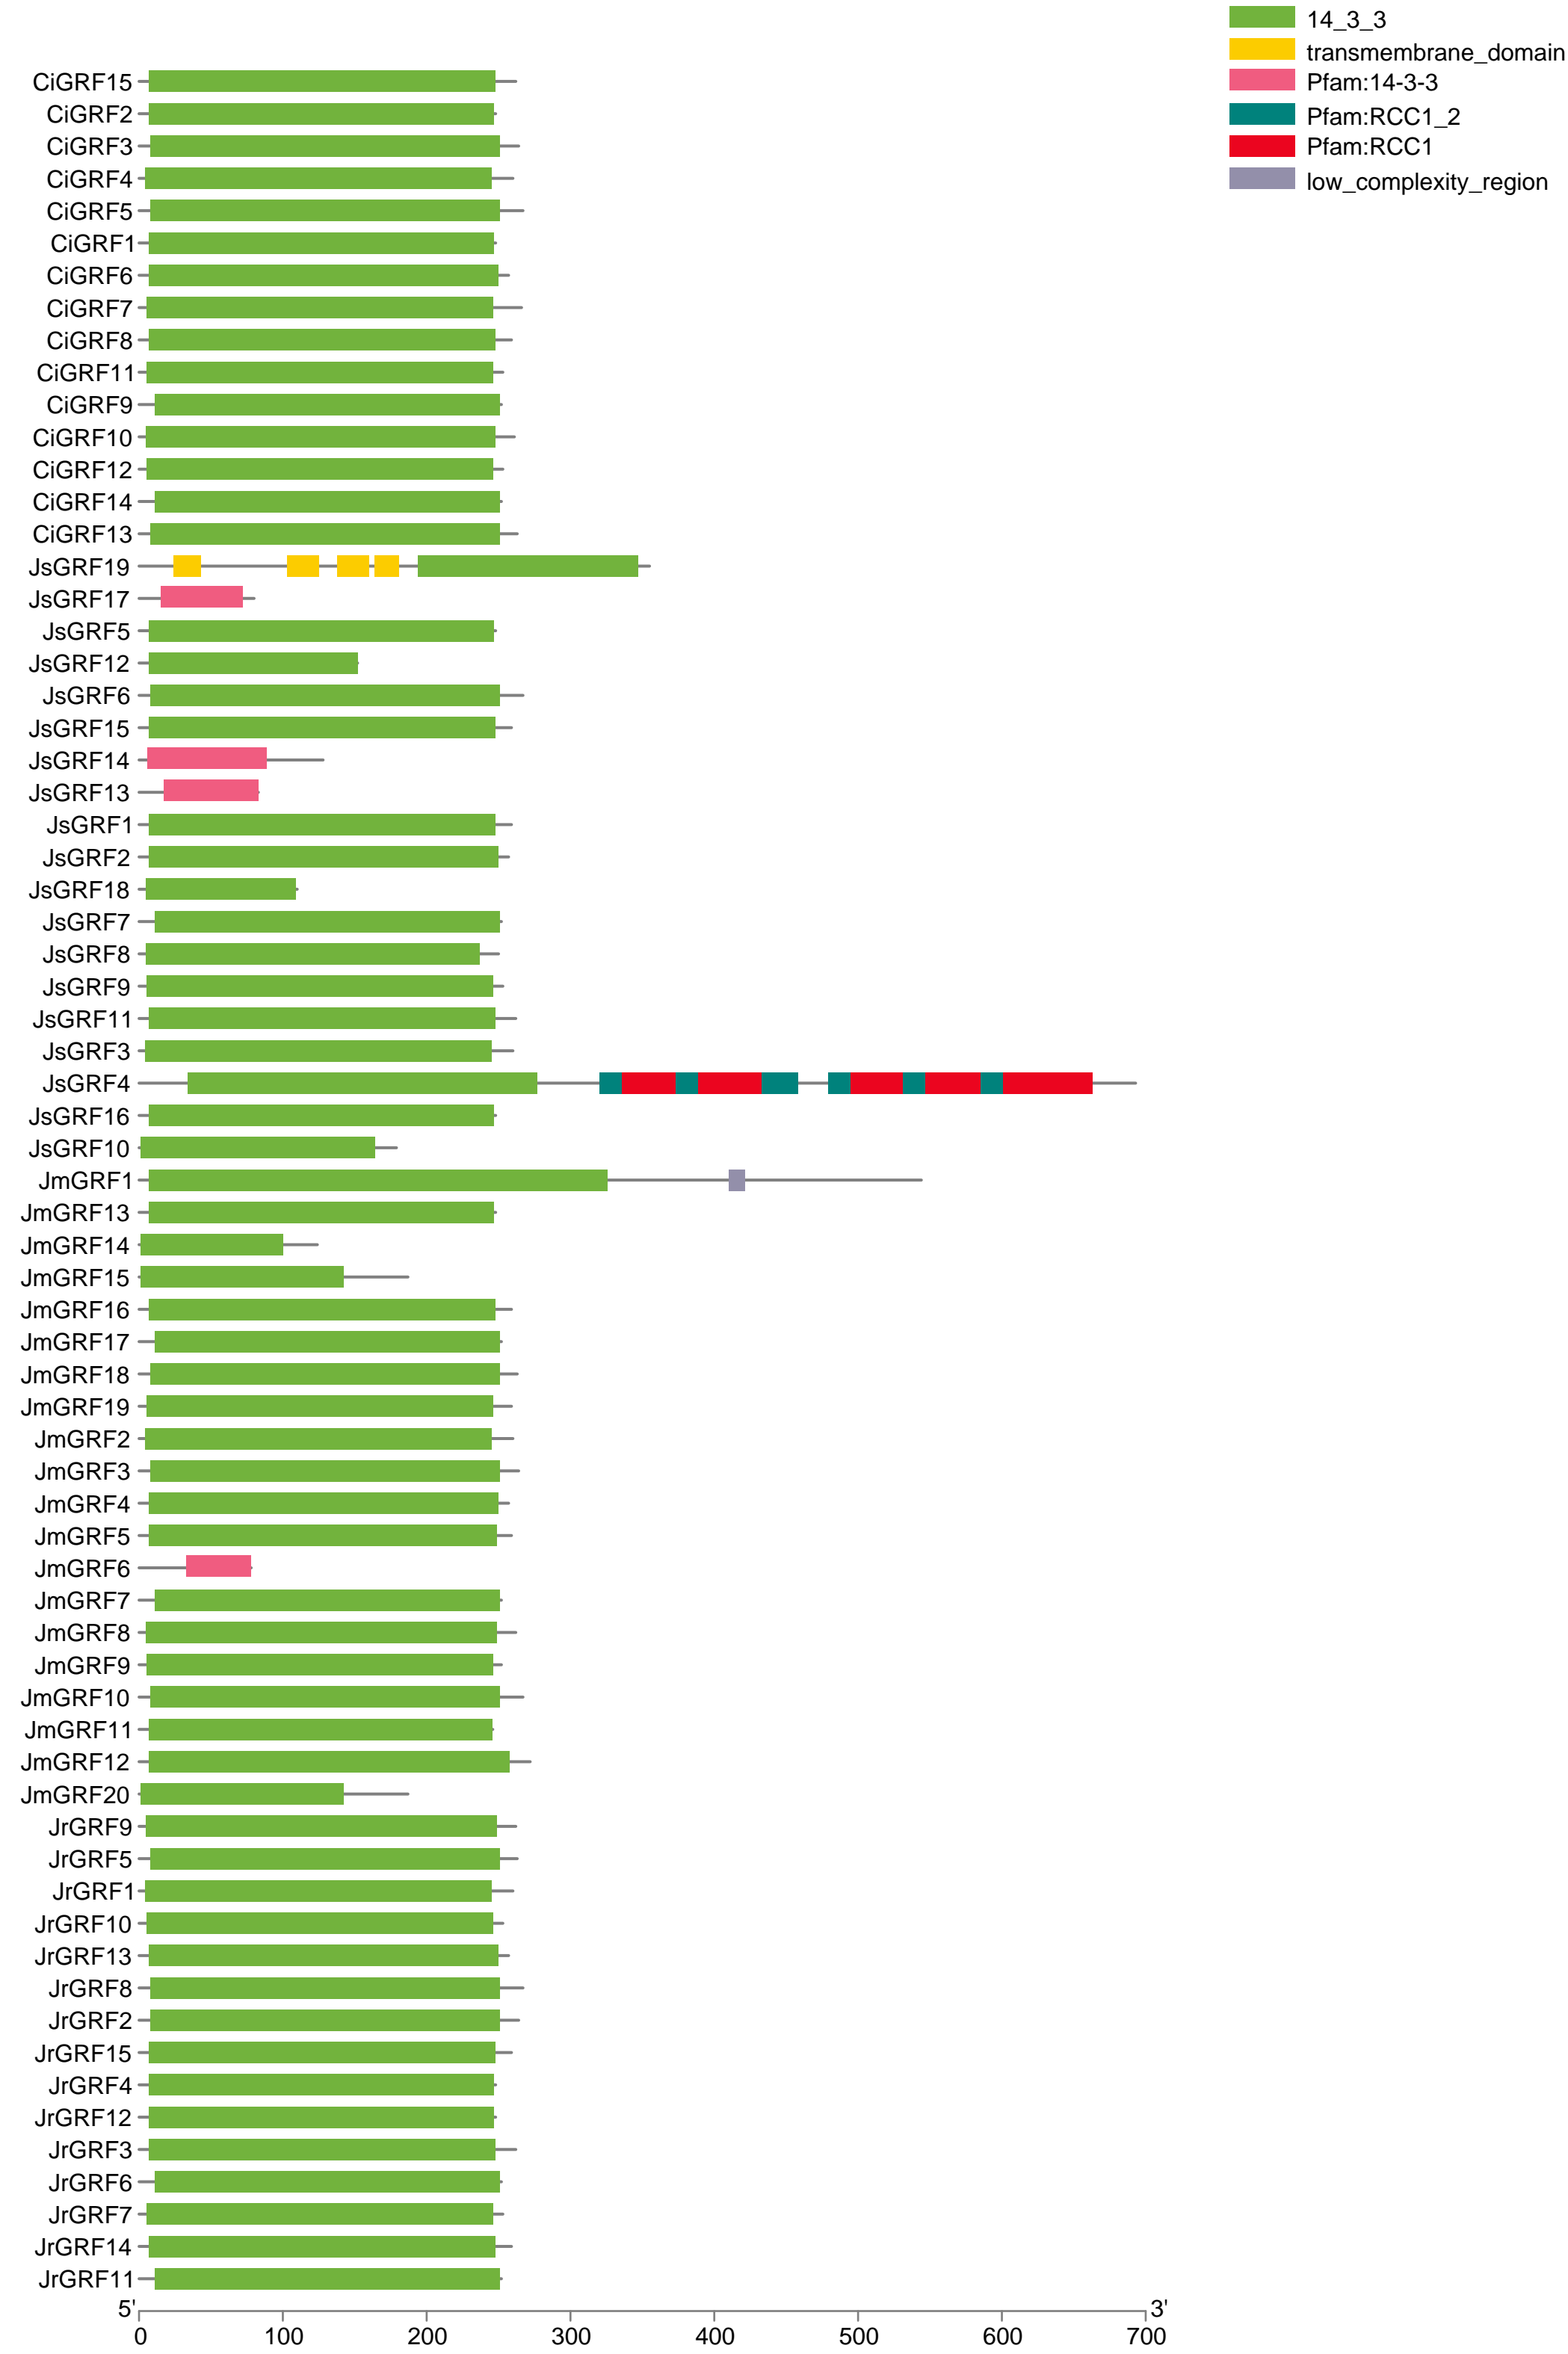

Supplement: s1 [file s1]
